# Supplementary material
Source: PubMed Central journal article supplement (PMC2708761)
Supplement: 0900664106_Appendix_PDF.pdf [file 0900664106_Appendix_PDF.pdf]

# SI Appendix

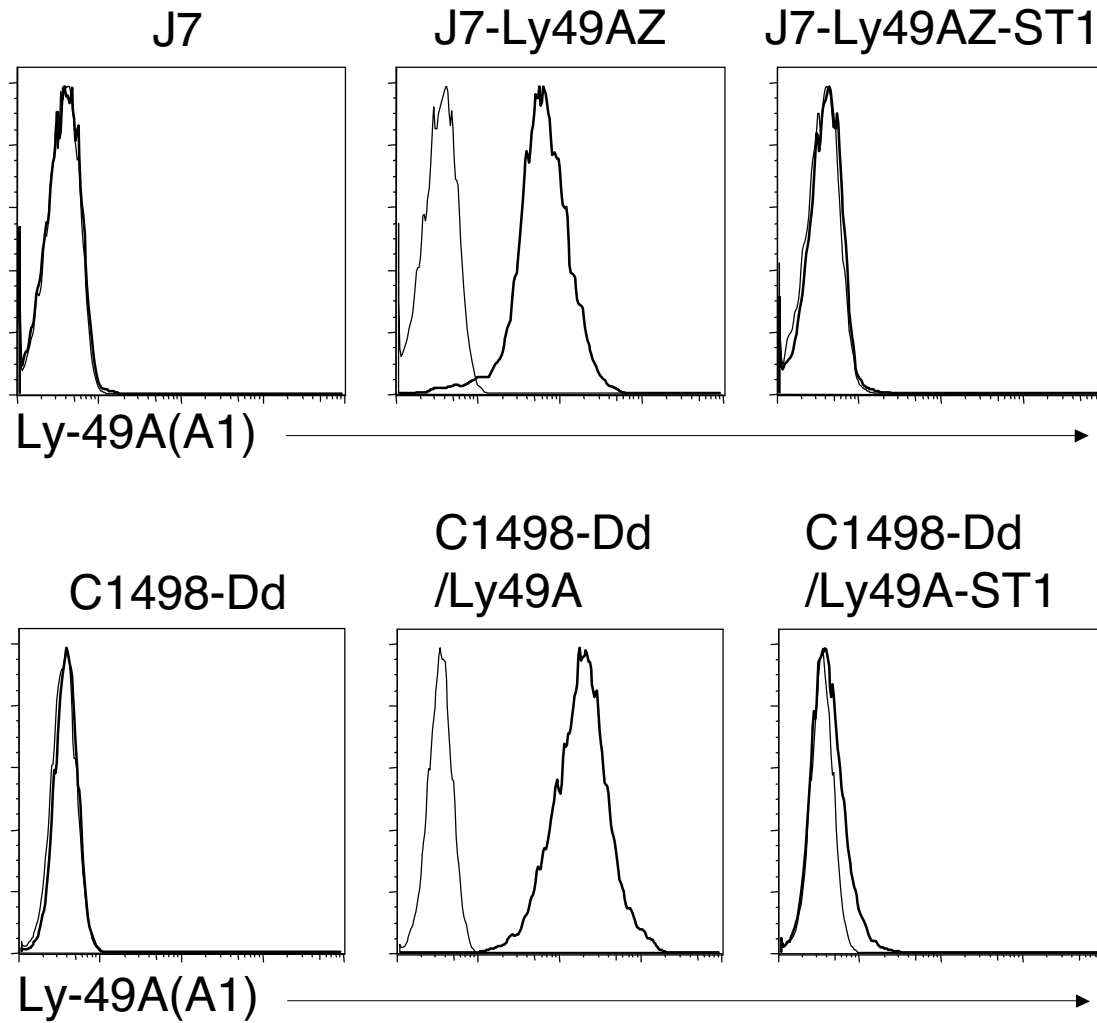

**SI Appendix Image 1.** No surface expression of Ly49A-ST1 on J7 reporter or C1498-D<sup>d</sup> target cells: FACS analyses using an anti-Ly49A mAb (A1) are shown.

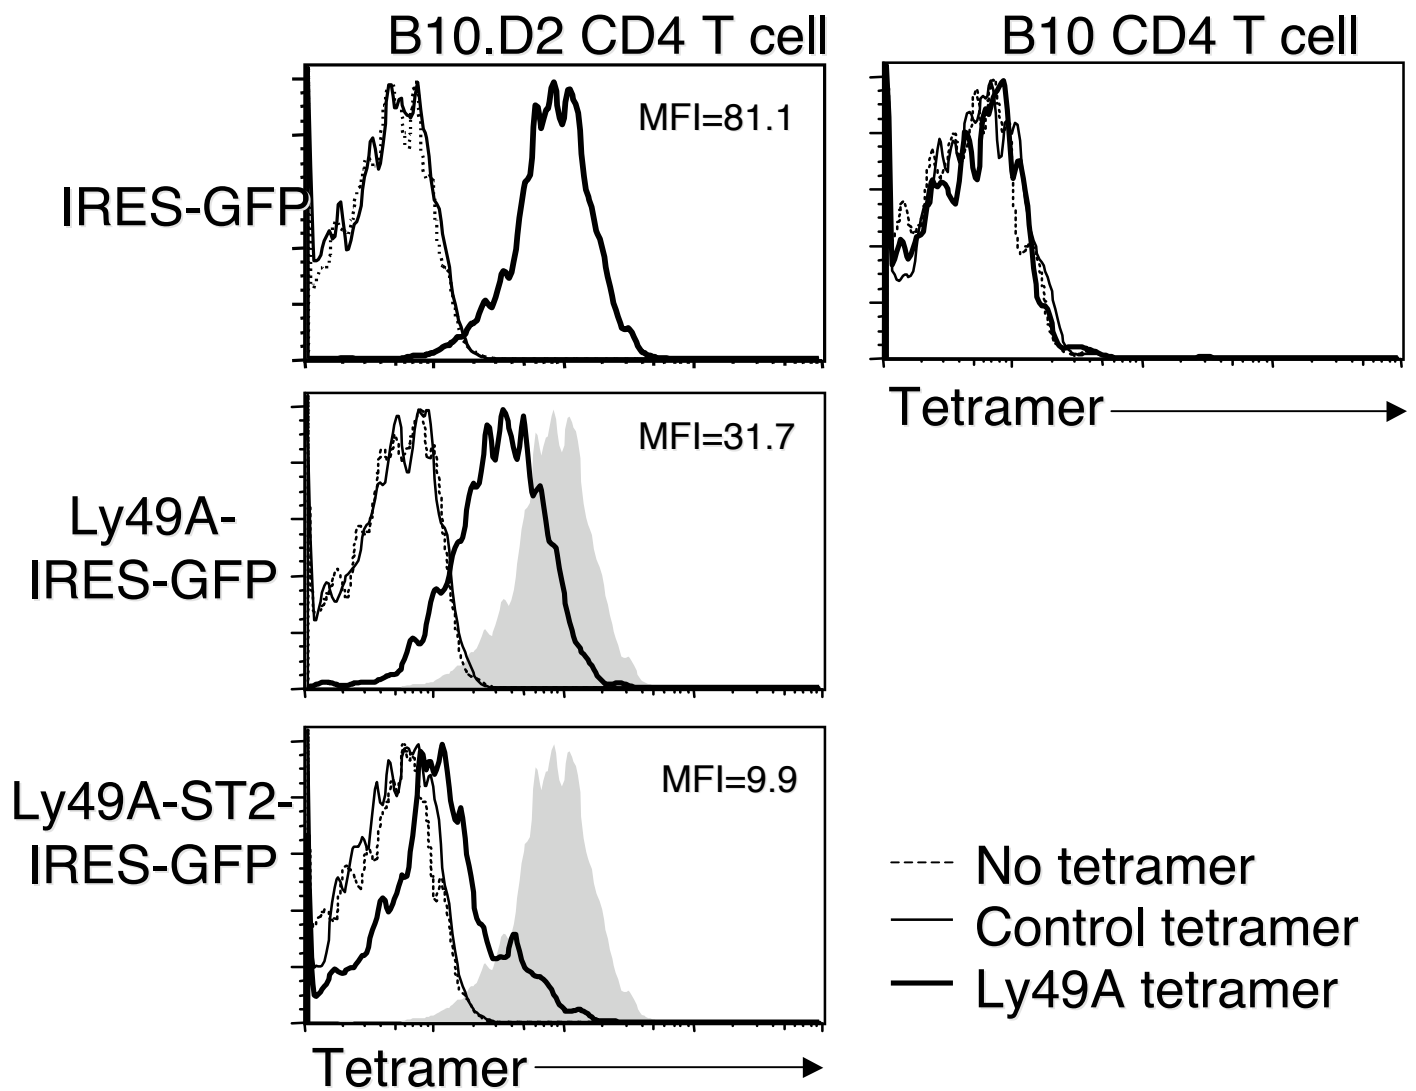

**SI Appendix Image 2.** Reduced Ly49A tetramer binding to primary CD4 T cells expressing H2<sup>d</sup> and Ly49A. Indicated retrovirus constructs were transduced into CD4 T cells from B10.D2, respectively. GFP-positive cells were gated and stained with streptavidin-phycoerythrin (SA-PE)-conjugated Ly49A or control (H2D<sup>d</sup>/hβ2m) tetramers (left panel) and with biotinylated A1 mAb followed by SA-PE (right panel). Grey shades represent the overlaid histogram of the tetramer binding to the pMX-IRES-GFP-transduced cells.

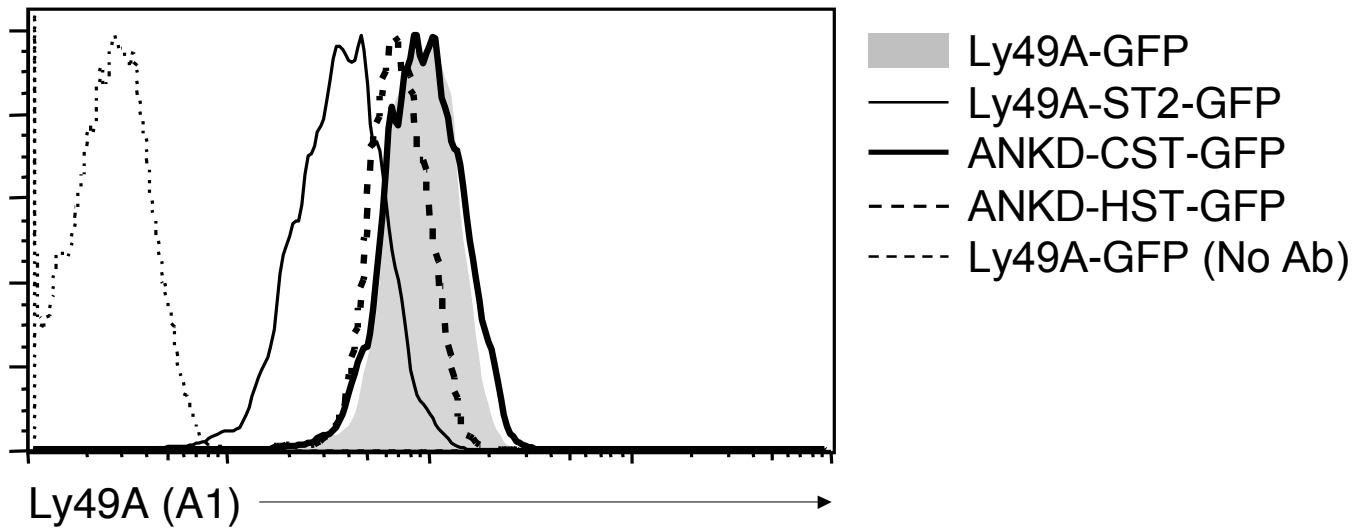

**SI Appendix Image 3.** Reduced anti-Ly49A mAb binding to Ly49A-ST2. Indicated retrovirus constructs of GFP-fusion protein were transduced into J7 cells, respectively. GFP-positive cells were gated and stained with A1 mAb.

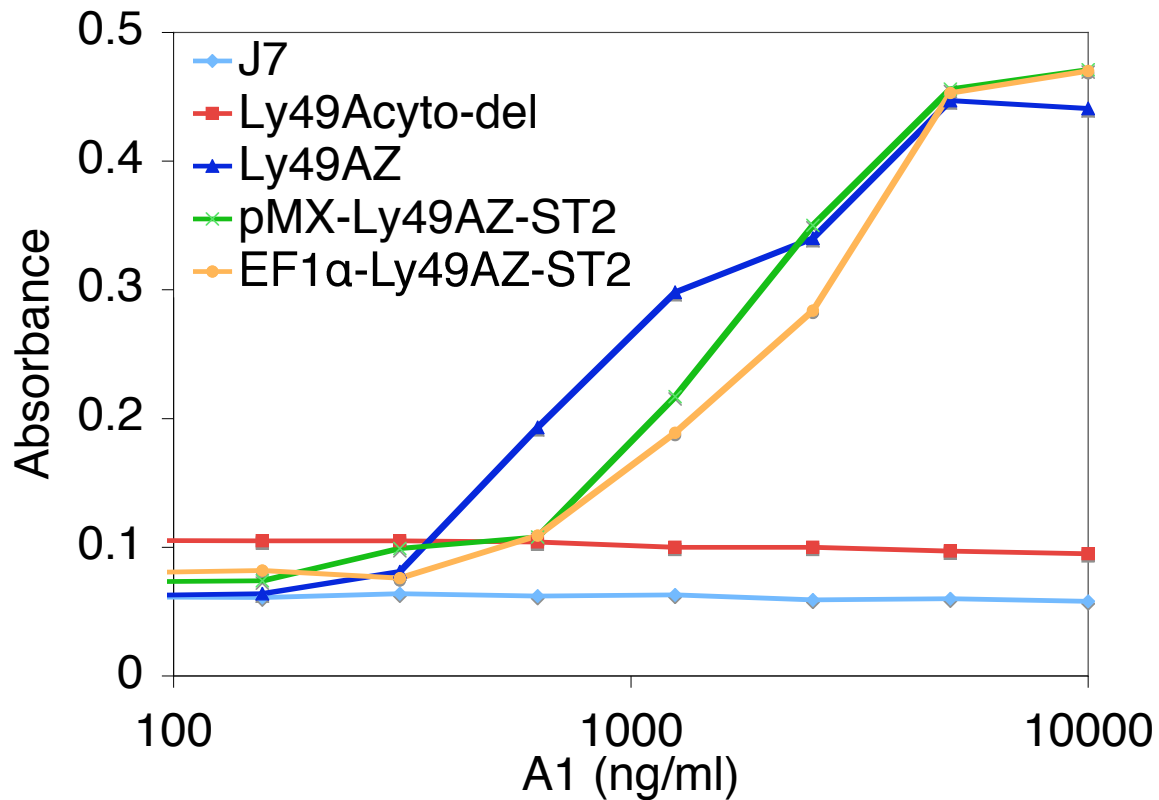

**SI Appendix Image 4.** Equivalent signaling ability of Ly49A-ST2 by mAb crosslinking regardless of the expression vector used. Ly49A-ST2 was transduced in J7 cells with lentivirus or retrovirus, and named as EF1 $\alpha$ -Ly49A-ST2 and pMX-Ly49A-ST2, respectively. Indicated doses of A1 mAb (100 $\mu$ l) were immobilized in a 96-well plate. Cells ( $1 \times 10^5$ ) of each reporter cell line were plated and incubated overnight. CPRG assays were then performed. J7 cells transduced with the lentivirus are referred to as J7-Ly49A-ST2 in the text.

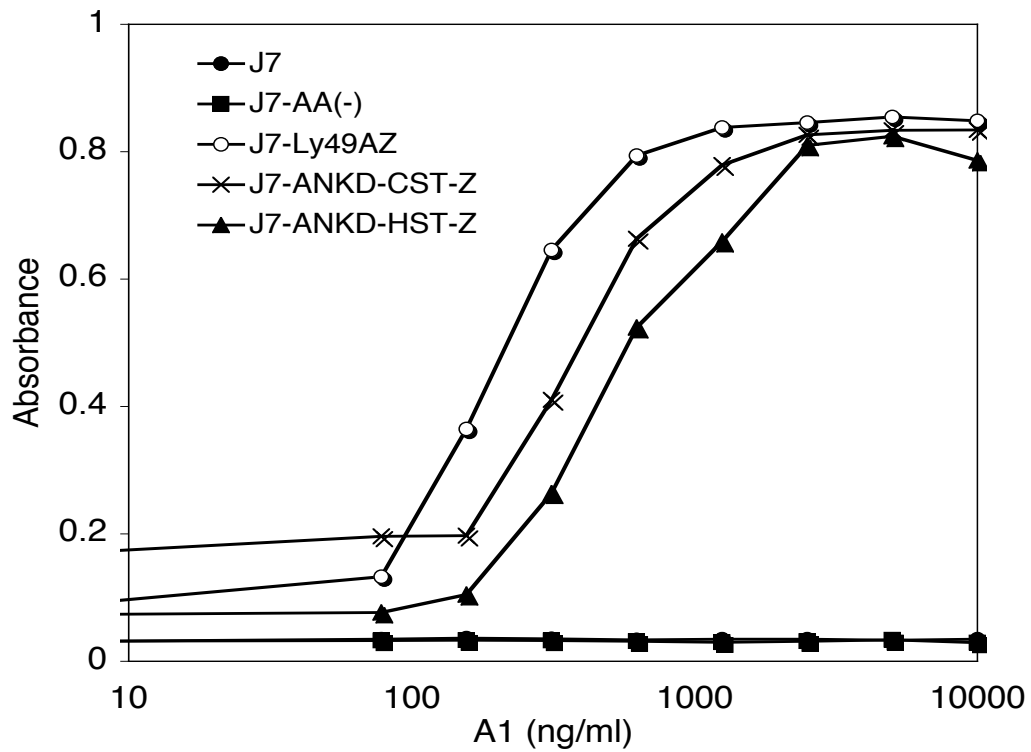

**SI Appendix Image 5.** Signaling ability of stalk-chimeric Ly49A receptors by mAb crosslinking. Indicated reporter cells were crosslinked by A1 mAb as in Image 4.

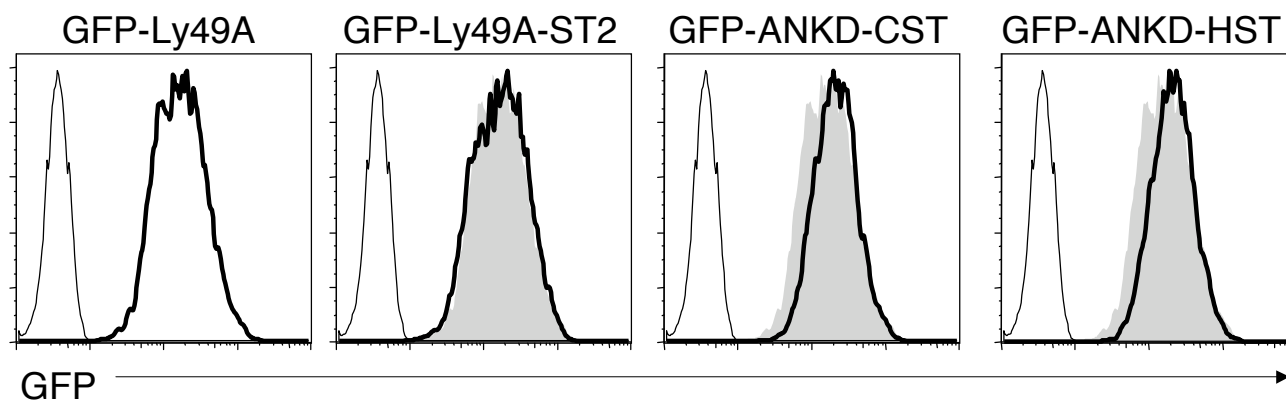

**SI Appendix Image 6.** Expression of stalk-chimeric Ly49A receptors fused to GFP. Indicated retrovirus constructs were transduced into J7 cells and GFP expression was analyzed by FACS. Grey shades represent the overlaid histogram of the GFP-Ly49A data.

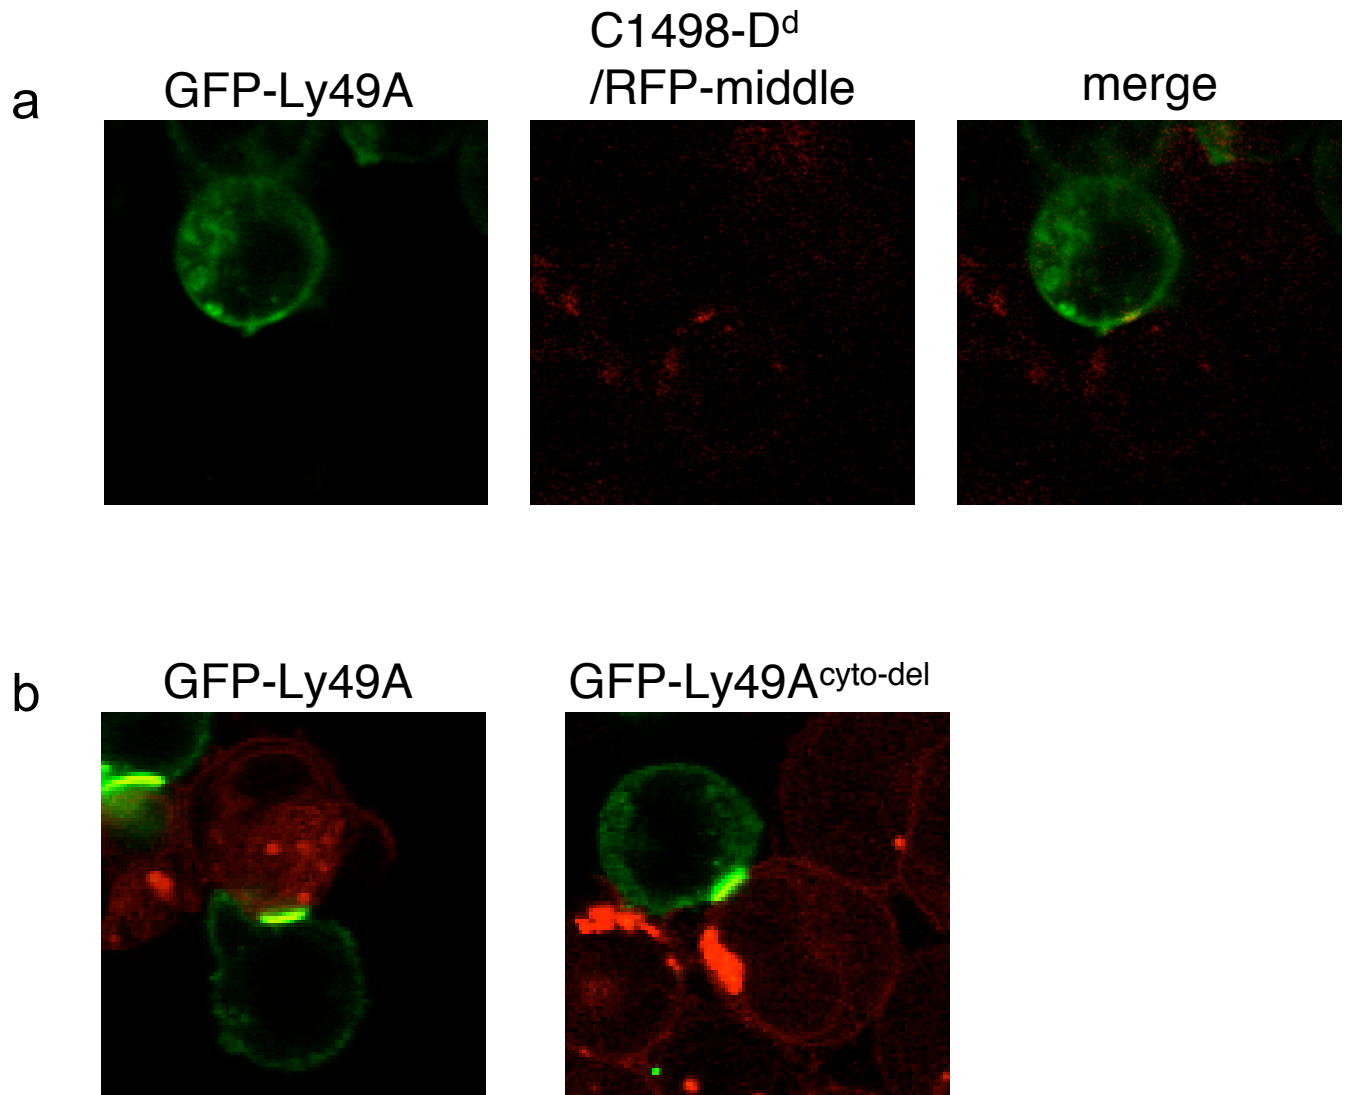

**SI Appendix Image 7.** IS formation. (a) Lower expression of D<sup>d</sup>-RFP results in failure to form clear IS formation with J7 cells expressing GFP-Ly49A. (b) The cytoplasmic ITIM is not required for IS formation. J7 cells expressing the cytoplasmic-deleted Ly49A fused to GFP (GFP-Ly49A<sup>cyto-del</sup>) formed ISs with C1498-D<sup>d</sup>/RFP.

|          | Synapse size | GFP intensity |
|----------|--------------|---------------|
| Ly-49A   | 0.33±0.07    | 5.36±1.31     |
| ANKD-HST | 0.33±0.10    | 5.37±0.83     |

**SI Appendix Image 8.** Similar clustering of stalk-chimeric ANKD-HST to wild-type Ly49A receptors. Synapse size was evaluated as the ratio of synapse length/diameter of cells. The integrated intensity of GFP was measured for each synapse. Averaged values from 20 synapses are shown. P-values (t-test) for size and intensity were 0.87 and 1.00, respectively.



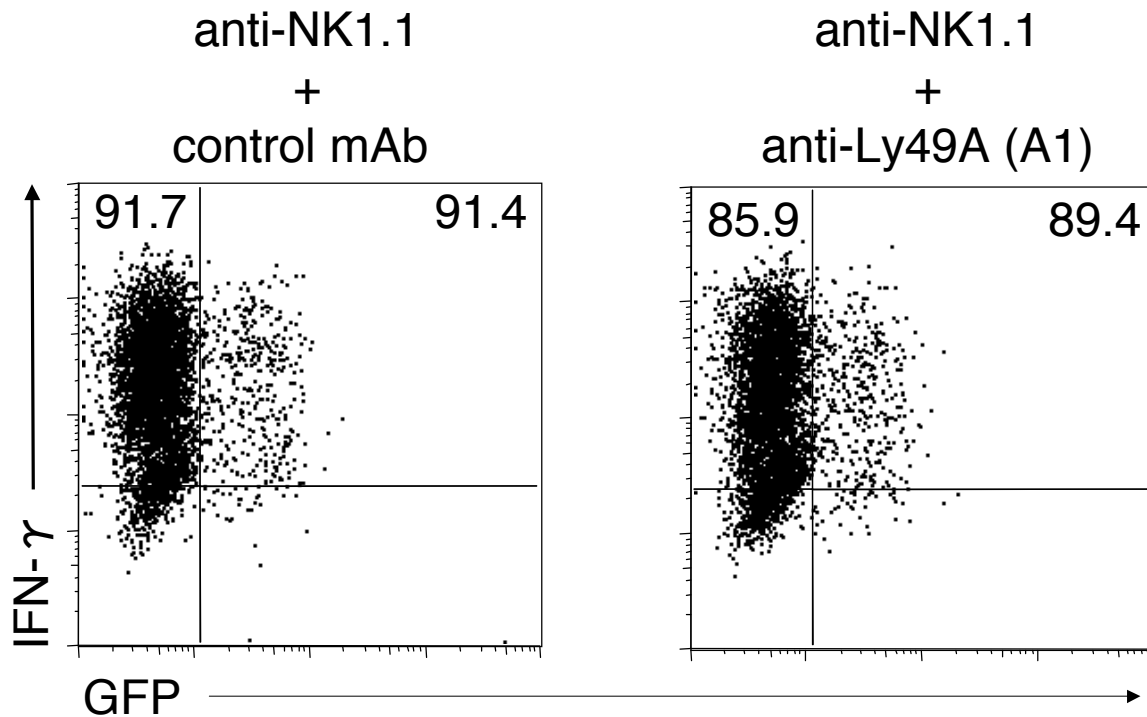

**SI Appendix Image 9.** GFP-chimeric Ly49A receptors fail to inhibit cytokine production by mAb crosslinking. Ly49A-negative LAK cells were transduced with lentivirus encoding GFP-chimeric Ly49A. Three days after the infection, LAK cells were crosslinked with the anti-NK1.1 and anti-Ly49A mAb or the anti-NK1.1 and isotype control mAb. Numbers represent the percentages of IFN- $\gamma$  cells among the GFP<sup>+</sup> or GFP<sup>-</sup> cell populations. 100  $\mu$ g/ml control mAb or A1 were immobilized. Representative data from three independent experiments are shown.

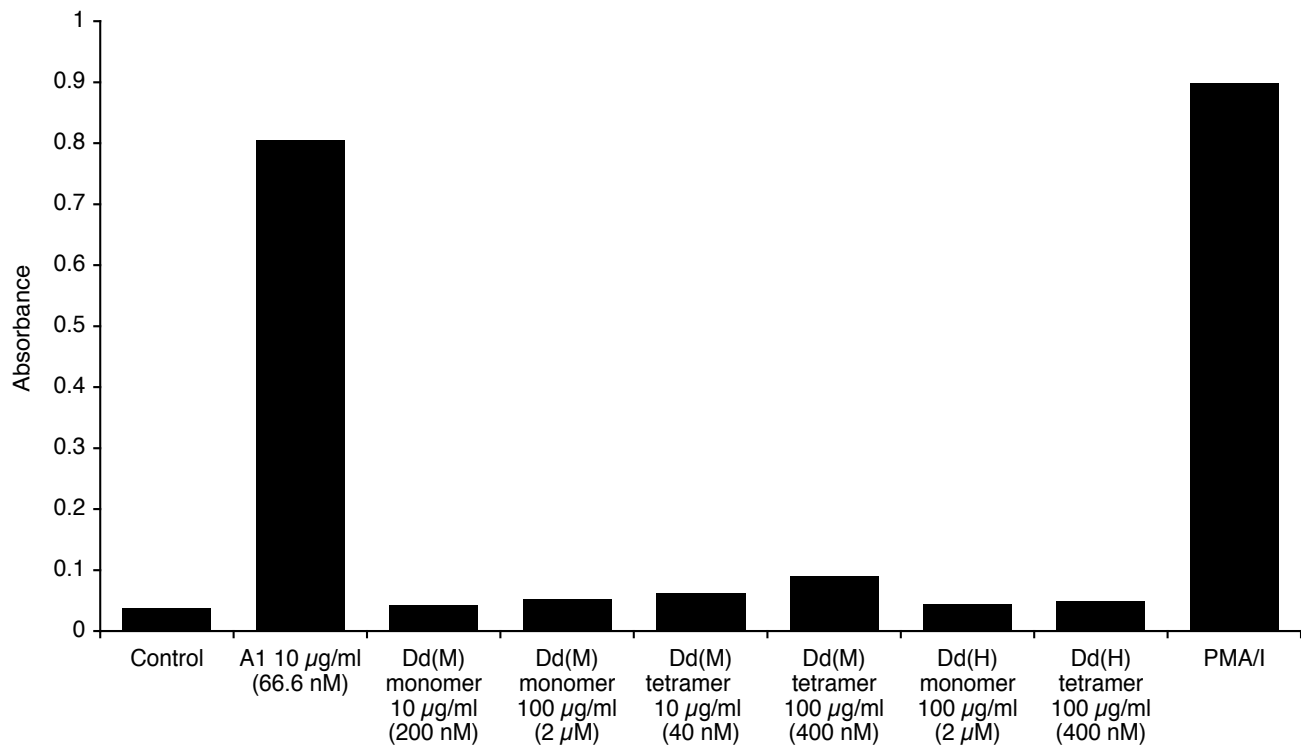

**SI Appendix Image 10.** Plate-bound  $D^d/m\beta 2$  monomer and tetramers fail to stimulate Ly49A reporter cells. Indicated doses of protein were coated on a 96-well plate. Ly49A reporter assays were performed. Dd(M):  $D^d/m\beta 2$ ; Dd(H):  $D^d/h\beta 2$ ; Control: no protein coated.
